# Supplementary material for: Effects of crystal structure of TiO2 on Pd-based catalysts
Source: Royal Society of Chemistry journal article supplement (doi:10.1039/d4nj04986a), 2025-01-01
Supplement: d4nj04986a1.pdf [file d4nj04986a1.pdf]

## Supporting information

### Effects of crystal structure of TiO<sub>2</sub> on the Pd-based catalysts

Fangxu Lu\*, Song Wen, Jie Jiang\*, Jinchong Zhao, Changsheng Zhang, Junjie Feng,  
Jing Zhang, Bing Sun, Wei Xu

State Key Laboratory of Chemical Safety, SINOPEC Research Institute of Safety Engineering Co.,  
Ltd., Qingdao, Shandong 266071, China.

\*Corresponding authors: lfx18366100161@163.com (F. Lu); jiangj.qday@sinopec.com (J. Jiang);

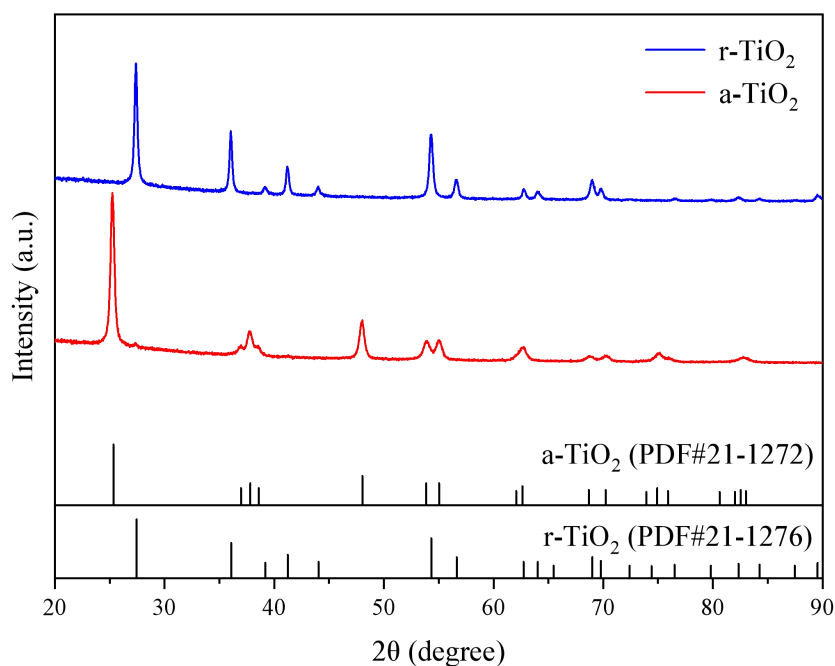

Fig. S1 The XRD patterns for the a-TiO<sub>2</sub> support and r-TiO<sub>2</sub> support.

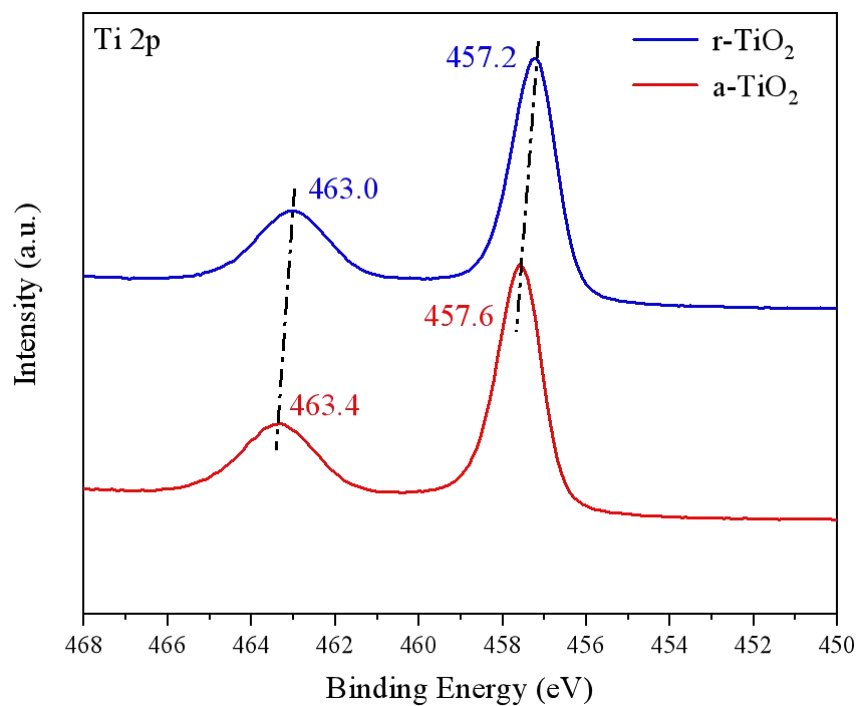

Fig. S2 XPS spectra of Ti 2p for the used Pd/r-TiO<sub>2</sub> catalyst and Pd/a-TiO<sub>2</sub> catalyst.

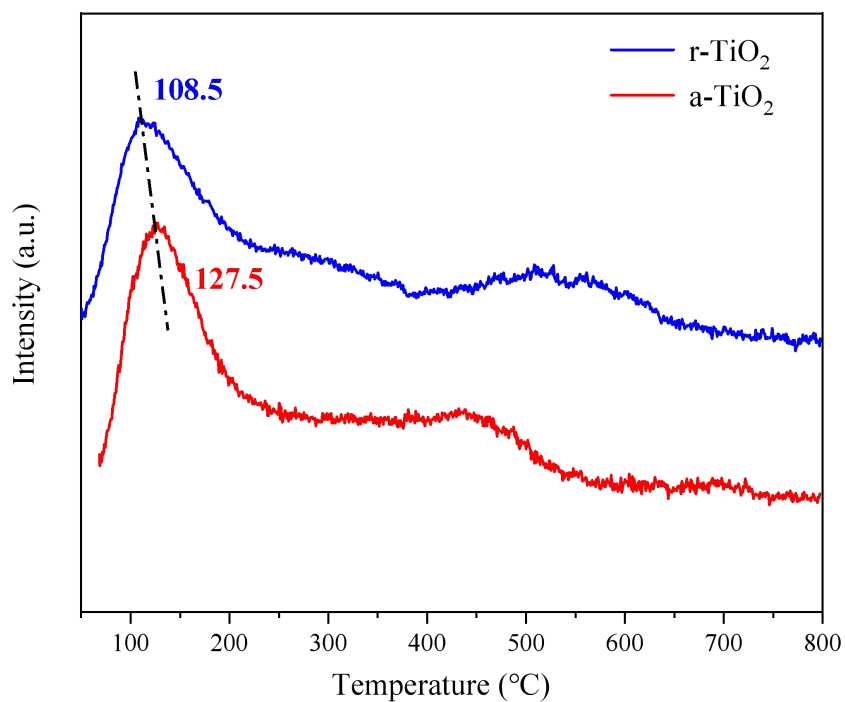

Fig. S3 H<sub>2</sub>-TPD profiles for the used Pd/r-TiO<sub>2</sub> catalyst and Pd/a-TiO<sub>2</sub> catalyst.

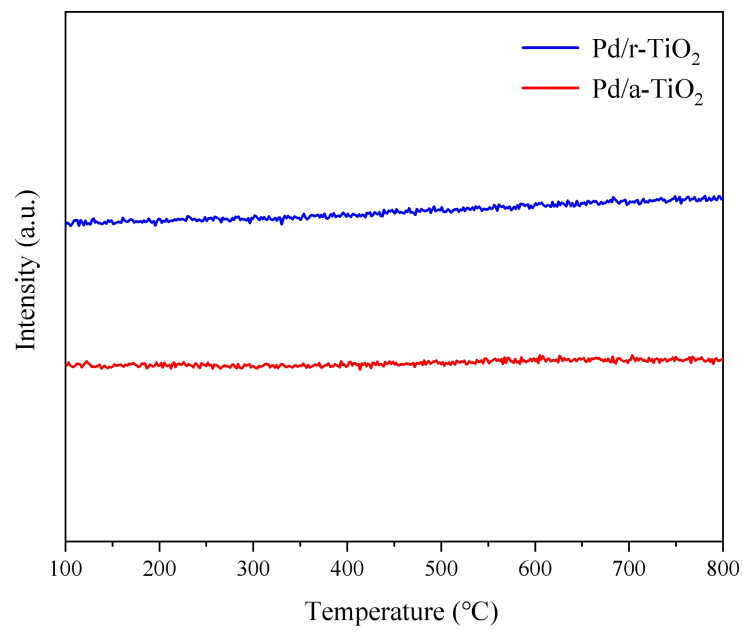

Fig. S4 Blank experiments of TPD for the Pd/r-TiO<sub>2</sub> and Pd/a-TiO<sub>2</sub>.

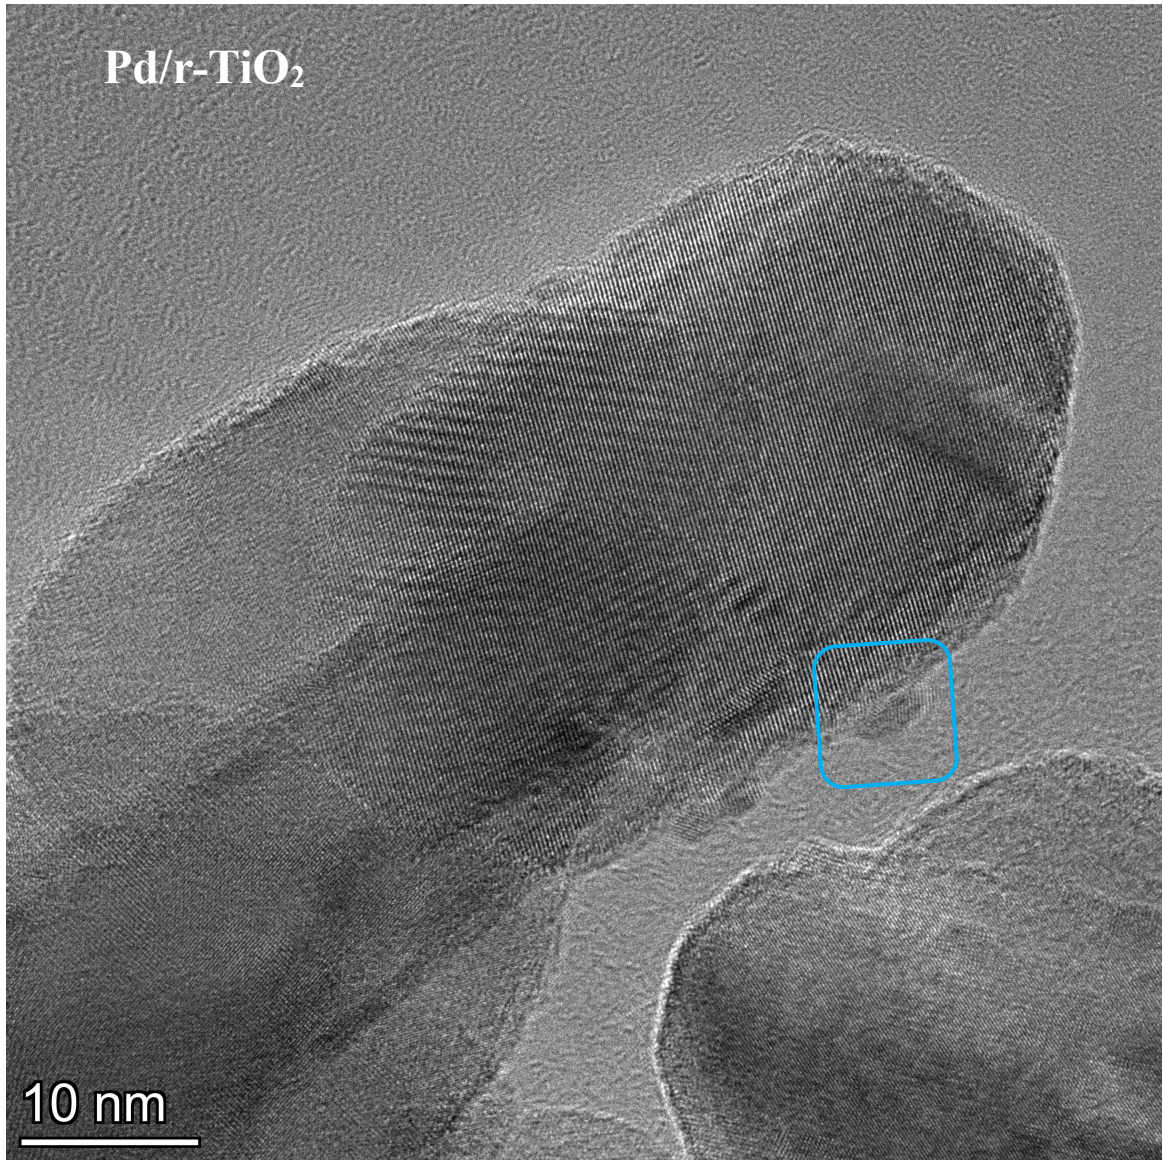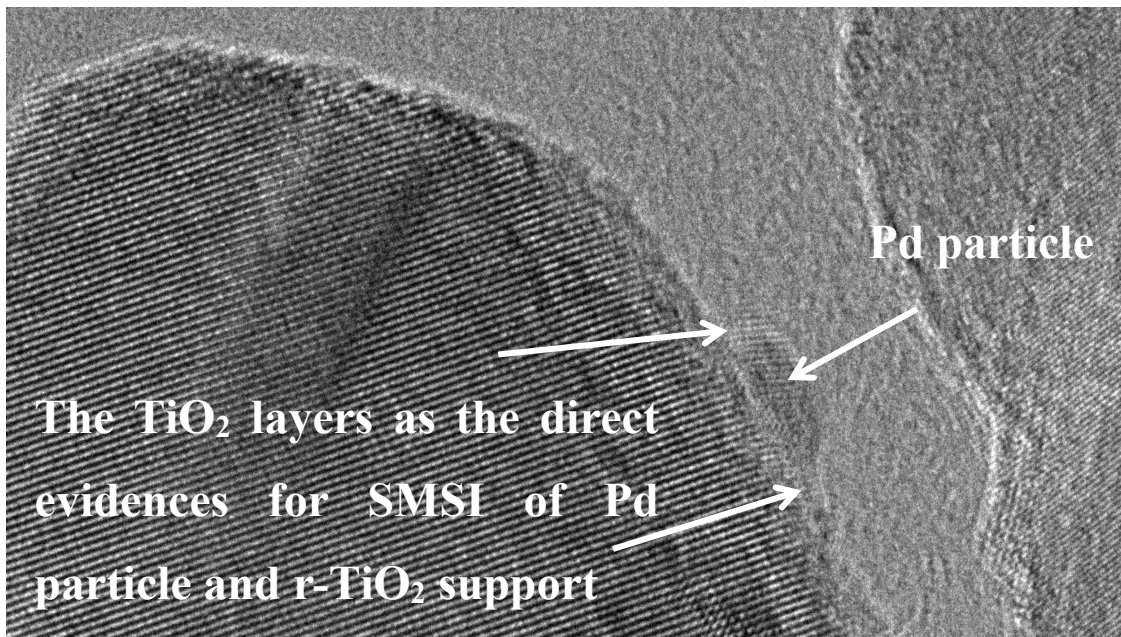

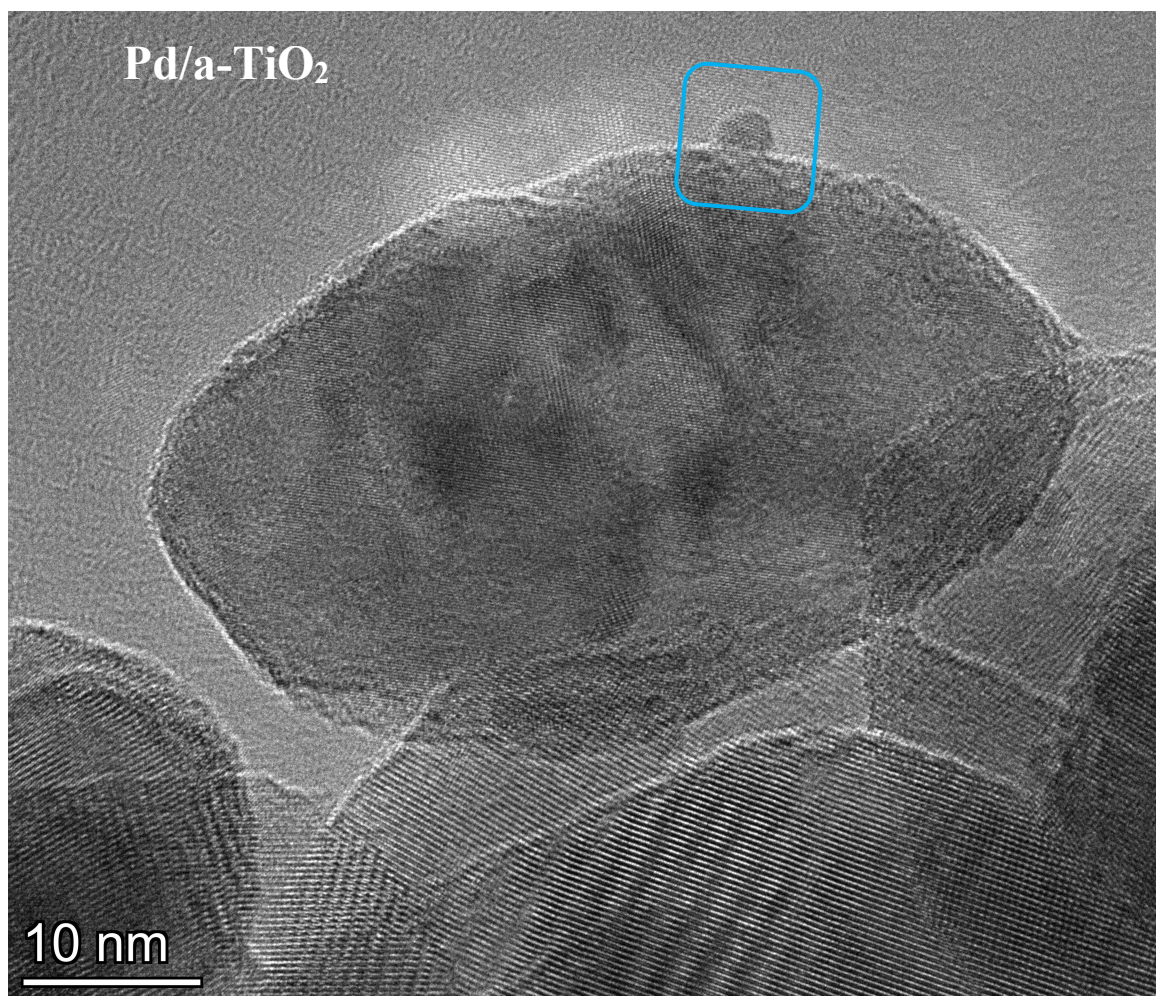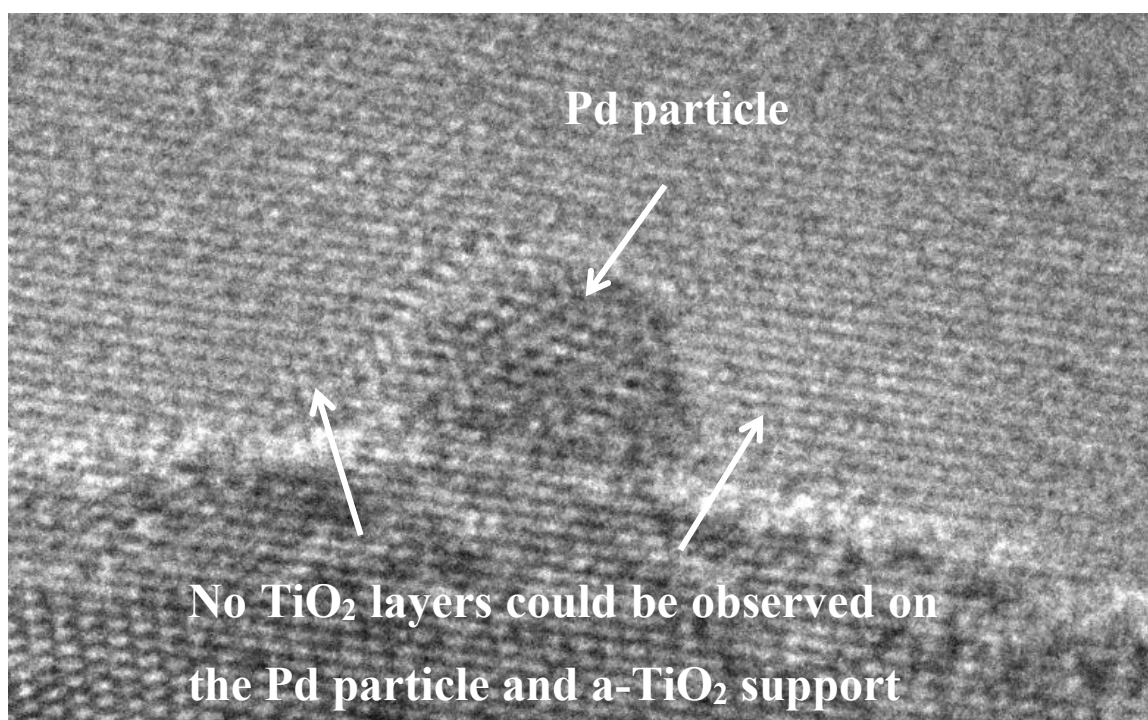

Fig. S5 HR-TEM for the used Pd/r-TiO<sub>2</sub> catalyst and Pd/a-TiO<sub>2</sub> catalyst.

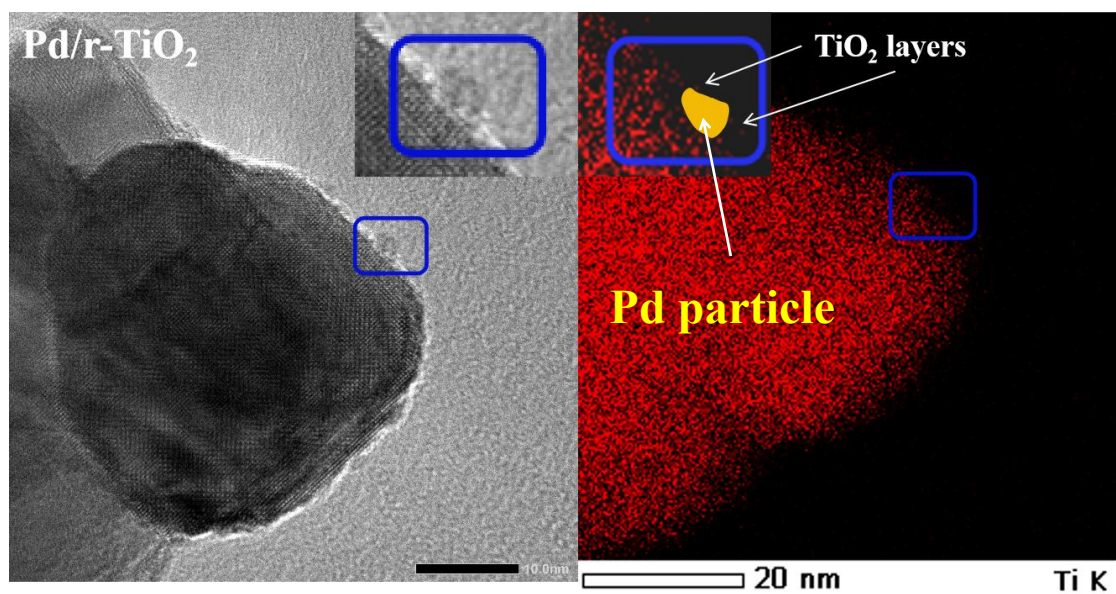

Fig. S6 TEM/EDX elemental mapping of Ti for the used Pd/r-TiO<sub>2</sub> catalyst.

Table S1. Structural parameters of TiO<sub>2</sub> and various Pd-based catalysts

| Catalysts             | Surface area        | Pore volume          |
|-----------------------|---------------------|----------------------|
|                       | (m <sup>2</sup> /g) | (cm <sup>3</sup> /g) |
| r-TiO <sub>2</sub>    | 42.9                | 0.21                 |
| a-TiO <sub>2</sub>    | 54.5                | 0.27                 |
| Pd/r-TiO <sub>2</sub> | 35.6                | 0.18                 |
| Pd/a-TiO <sub>2</sub> | 45.2                | 0.28                 |

Table S2. The results of XPS for Pd 3d<sub>5/2</sub>.

| Catalysts             | Binding energy (eV)  |                 | Surface content of Pd                |                 | Pd <sup>2+</sup> /Pd <sup>0</sup> |
|-----------------------|----------------------|-----------------|--------------------------------------|-----------------|-----------------------------------|
|                       | Pd 3d <sub>5/2</sub> |                 | species (atom%) Pd 3d <sub>5/2</sub> |                 |                                   |
|                       | Pd <sup>2+</sup>     | Pd <sup>0</sup> | Pd <sup>2+</sup>                     | Pd <sup>0</sup> |                                   |
| Pd/r-TiO <sub>2</sub> | 336.5                | 335.2           | 80.96                                | 19.04           | 4.3                               |
| Pd/a-TiO <sub>2</sub> | 336.2                | 334.9           | 72.98                                | 27.02           | 2.7                               |
